# Supplementary material for: Alcohol-soluble interfacial fluorenes for inverted polymer solar cells: sequence induced spatial conformation dipole moment
Source: Royal Society of Chemistry journal article supplement (doi:10.1039/c5cp05589j), 2015-12-08
Supplement: c5cp05589j1.pdf [file c5cp05589j1.pdf]

## Supporting information

### **Alcohol-Soluble Interfacial Fluorenes for Inverted Polymer Solar Cells: Sequence Induced Spatial Conformation Consequently Dipole Moment**

Lie Chen<sup>a,b</sup>, Xiangfu Liu<sup>a</sup>, Yingkai Wei<sup>a</sup>, Feiyan Wu<sup>a</sup>, Yiwang Chen<sup>\*a,b</sup>

<sup>a</sup>College of Chemistry/Institute of Polymers, Nanchang University, 999 Xuefu  
Avenue, Nanchang 330031, China

<sup>b</sup>Jiangxi Provincial Key Laboratory of New Energy Chemistry, Nanchang  
University, 999 Xuefu Avenue, Nanchang 330031, China

Corresponding author. Tel.: +86 791 83968703; fax: +86 791 83969561. E-mail:  
ywchen@ncu.edu.cn (Y. Chen)

Lie Chen and Xiangfu Liu contributed equally to this work.

### **General measurements and characterization.**

The nuclear magnetic resonance (NMR) spectra were collected on a Bruker ARX 400 NMR spectrometer with deuterated chloroform as the solvent and with tetramethylsilane ( $\delta=0$ ) as the internal standard. The photoluminescence spectroscopy (PL, Hitachi F-7000), transmittance spectroscopy, UV-vis-NIR spectroscopy, diffuse reflectance spectroscopy (performed by PerkinElmer Lambda 750 with integrating sphere) were utilized. The UPS measurements were carried out in a Thermo-VG Scientific ESCALAB 250 using a He I (21.22 eV) discharge lamp. A bias of -8.0 V was applied to the samples for separation of the sample and the secondary edge for the analyzer. XPS studies were performed on a Thermo-VG Scientific ESCALAB 250 photoelectron spectrometer using a monochromated AlK $\alpha$  (1,486.6 eV) X-ray source. All recorded peaks were corrected for electrostatic effects by setting the C-C component of the C 1s peak to 284.8eV. The base pressure in the XPS analysis chamber was  $2 \times 10^{-9}$  mbar. Atomic force microscopic (AFM) images were measured on a nanoscope III A (Digital Instruments) scanning probe microscope using the tapping mode. TEM images were recorded using a JEOL-2100F transmission electron microscope and an internal charge-coupled device (CCD) camera.

### **Cyclic voltammetry.**

Cyclic voltammetry was performed in an electrolyte solution of 0.1 M tetrabutylammonium hexafluorophosphate in acetonitrile, both working and counter electrodes were platinum electrode. Ag/AgCl electrode was used as thereference electrode (**Figure S1**).

### **Space-charge-limited-current (SCLC) mobility measurement.**

In order to characterize the carrier mobility of modified device, electron-only devices and hole-only devices were fabricated. The electron-only devices used a diode configuration of ITO/ETLs/P3HT:PCBM/LiF/Al The carrier mobility was measured using the SCLC model at low voltage which is described by below Equation:<sup>1</sup>

$$J=9\epsilon_0\epsilon_r\mu V^2/8L^3$$

Where  $\epsilon_0$  is the permittivity of free space ( $8.85 \times 10^{-12} \text{ F}\cdot\text{m}^{-1}$ ),  $\epsilon_r$  is the dielectric constant of P3HT or PCBM (assumed to 3),  $\mu$  is the mobility of an electron,  $V$  is the applied voltage, and  $L$  is the film thickness.<sup>2</sup> The thickness of the BHJ blend for SCLC measurement was about 120 nm. By fitting the results to a space-charge-limited form,  $J^{0.5}$  versus  $V$  is plotted in **Figure 5c**.

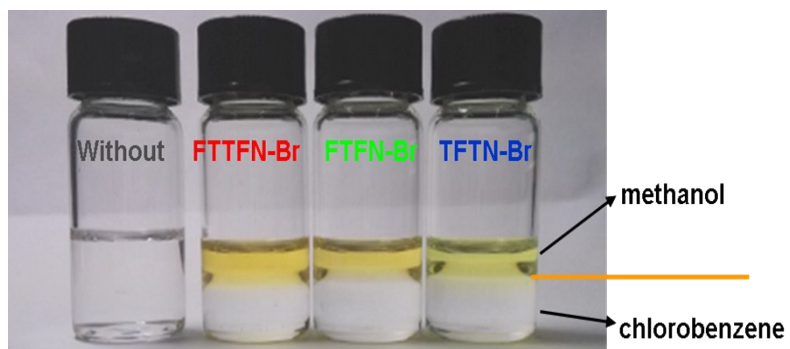

**Figure S1.** The SMEs dissolved in the methanol/chlorobenzene mixed solution

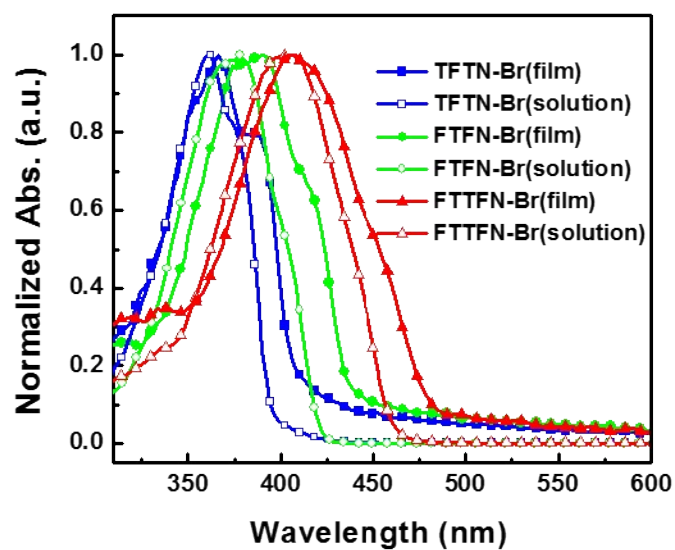

**Figure S2.** Normalized UV-vis absorption spectra of TFTN-Br, FTFN-Br and FTTFN-Br in their film state and solution

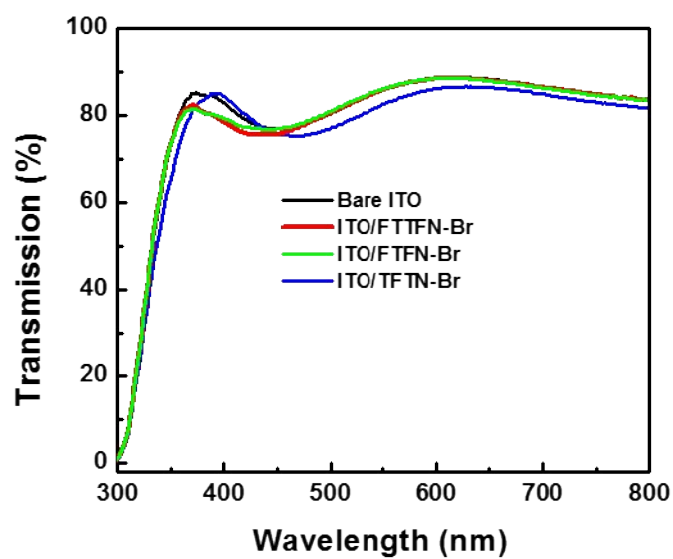

**Figure S3.** The optical transmittance spectra of the TFTN-Br, FTFN-Br, FTTFN-Br and bare ITO.

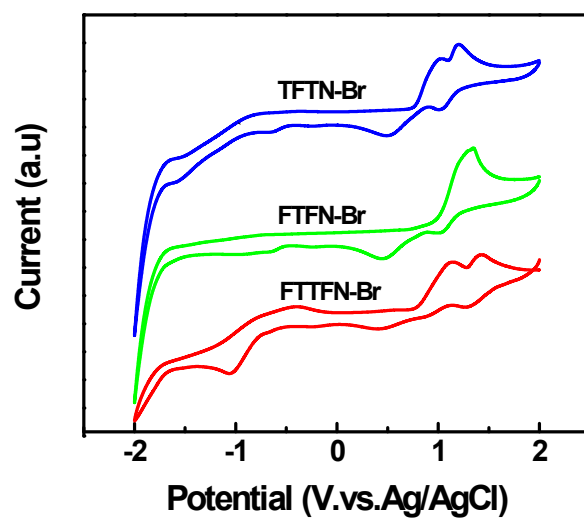

**Figure S4.** Cyclic voltammogram of TFTN-Br, FTFN-Br and FTTFN-Br films in an acetonitrile solution of 0.1 M  $\text{Bu}_4\text{NPF}_6$  at a scan rate of  $50 \text{ mV S}^{-1}$ .

**Table S1.** Optical and electrochemical properties of the SMEs

| compound | $\lambda_{\text{abs, max}}$<br>(solution) (nm) | $\lambda_{\text{abs, max}}$<br>(film) (nm) | $E_{\text{g}}^{\text{opt}}$<br>(eV) | $E_{\text{g}}^{\text{CV}}$<br>(eV) | HOMO<br>(eV) | LUMO<br>(eV) |
|----------|------------------------------------------------|--------------------------------------------|-------------------------------------|------------------------------------|--------------|--------------|
| TFTN-Br  | 361                                            | 366                                        | 2.95                                | 2.56                               | -5.16        | -2.60        |
| FTFN-Br  | 378                                            | 390                                        | 2.81                                | 2.51                               | -5.34        | -2.83        |
| FTTFN-Br | 403                                            | 411                                        | 2.55                                | 2.20                               | -5.20        | -3.00        |



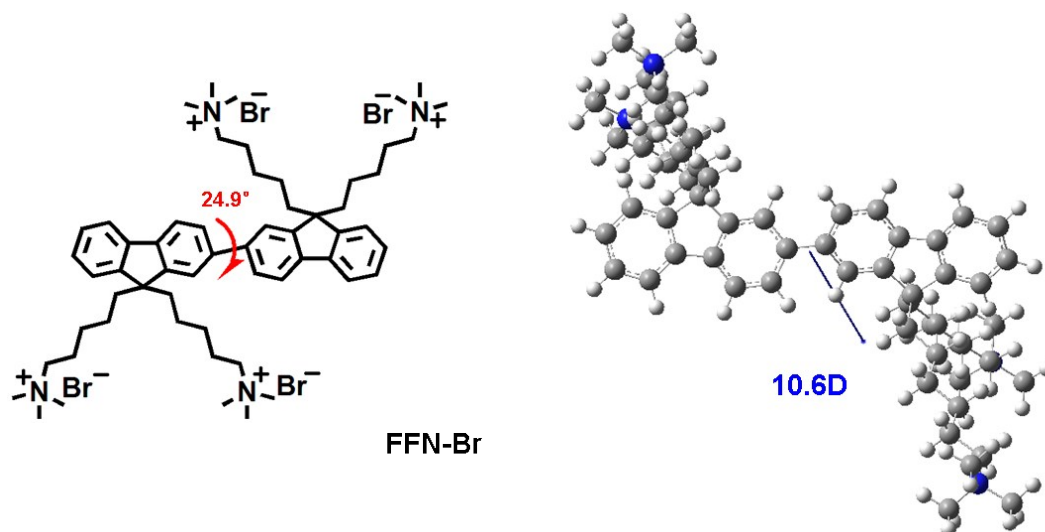

**Figure S5.** The density functional theory calculated results of the FFN-Br

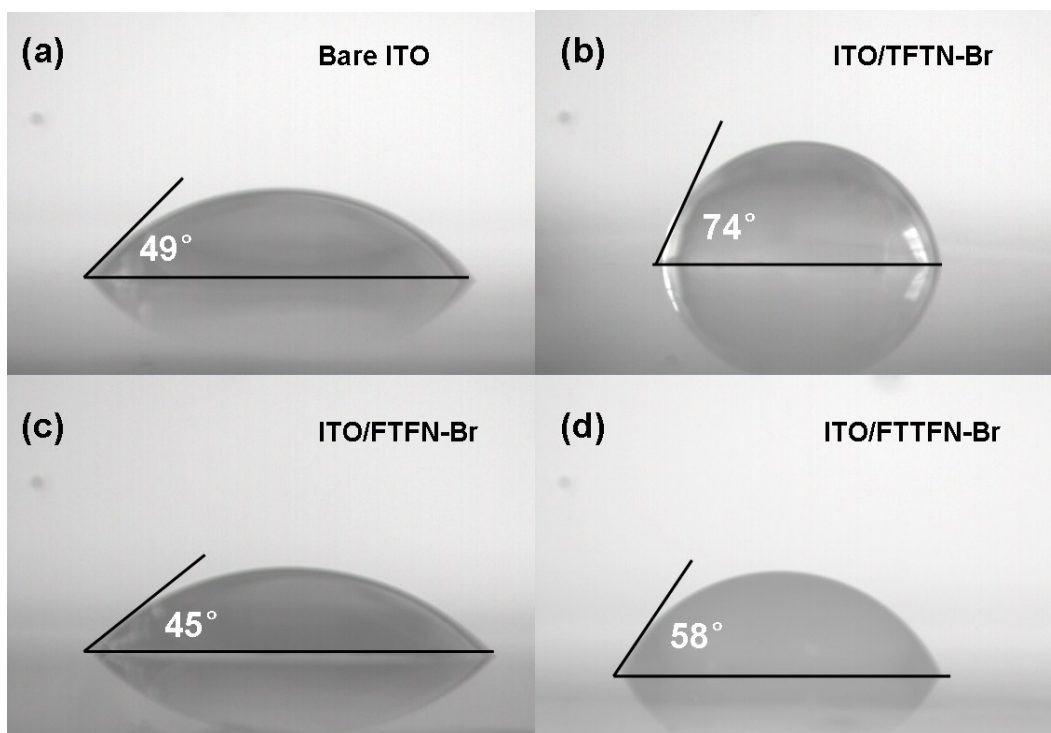

**Figure S6.** Water contact angle images of (a) bare ITO, (b) ITO/TFTN-Br (c) ITO/FTFN-Br and (d) ITO/FTTFN-Br

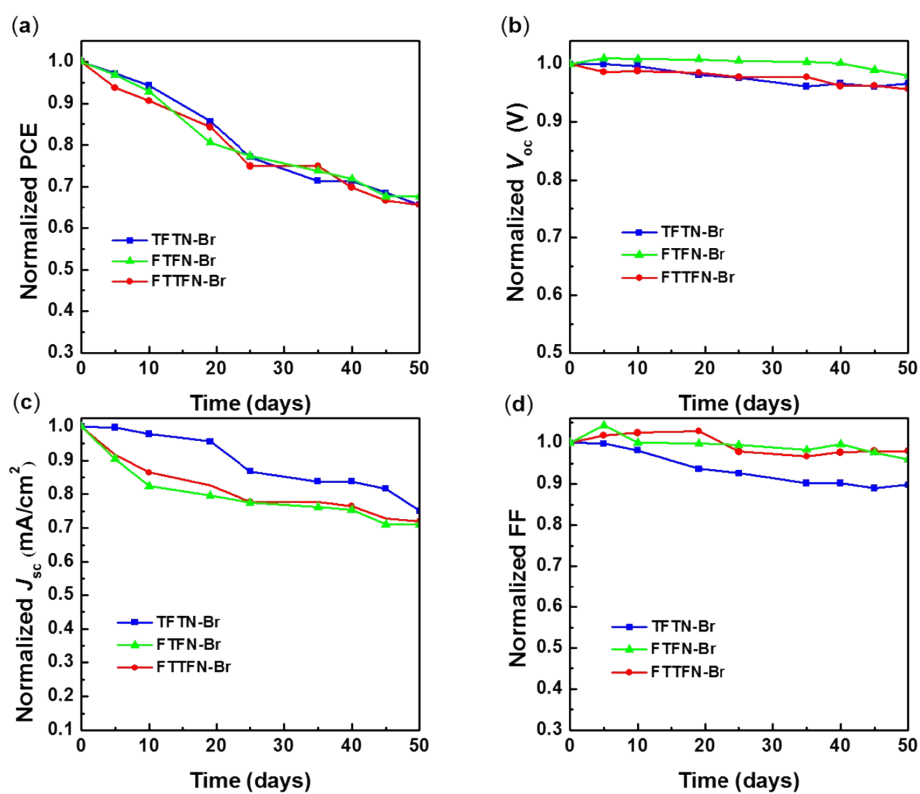

**Figure S7.** Stability test of the unencapsulated I-PSCs with various CSEs (a) PCE; (b)  $V_{oc}$ ; (c)  $J_{sc}$ ; (d) FF.

## Reference

1. H. Wei, H. Zhang, H. Sun, W. Yu, Y. Liu, Z. Chen, L. Cui, W. Tian and B. Yang, *J. Mater. Chem.*, 2012, **22**, 17827-17832.
2. H. C. Chen, C. W. Lai, I. C. Wu, H. R. Pan, I. W. P. Chen, Y. K. Peng, C. L. Liu, C. h. Chen and P. T. Chou, *Adv. Mater.*, 2011, **23**, 5451-5455.
